# Supplementary material for: Spatiotemporal dynamics and recurrence of chikungunya virus in Brazil: an epidemiological study
Source: PubMed Central journal article supplement (PMC10281060; doi:10.1016/s2666-5247(23)00033-2), 2023-04-06
Supplement: NIHMS1897922-supplement-2.pdf [file NIHMS1897922-supplement-2.pdf]

# THE LANCET Microbe

## Supplementary appendix 2

This appendix formed part of the original submission and has been peer reviewed.  
We post it as supplied by the authors.

Supplement to: de Souza WM, de Lima STS, Simões MelloLM, et al. Spatiotemporal dynamics and recurrence of chikungunya virus in Brazil: an epidemiological study. *Lancet Microbe* 2023; published online April 6. [https://doi.org/10.1016/S2666-5247\(23\)00033-2](https://doi.org/10.1016/S2666-5247(23)00033-2).

## Supplementary appendix

### Supplementary Information: Materials and Methods

#### Definition of cases

Laboratory-confirmed cases of chikungunya or dengue fever were defined as a patient with one positive laboratory result for CHIKV or DENV either by reverse-transcription quantitative polymerase chain reaction (RT-qPCR), immunoglobulin M (IgM) detection, immunoglobulin G (IgG), viral isolation (e.g., C6/36 cells), and/or non-structural protein 1 (NS1) antigen for DENV. No clinical epidemiological cases were included in this study.

#### Chikungunya virus genome sequencing and assembly genome

Positive RNA samples by RT-qPCR with cycle threshold (Ct) values <30 were submitted for CHIKV genome sequencing using a targeted multiplex PCR scheme and the MinION platform (Oxford Nanopore Technologies, UK), as described elsewhere (1). PCR products were cleaned using AmpureXP purification beads (Beckman Coulter, UK) and quantified using fluorimetry with the Qubit dsDNA High Sensitivity assay on the Qubit 3.0 instrument (Life Technologies, USA). Amplicons from each sample were normalized, pooled, and barcoded using the Rapid Barcoding Kit 96 kit (EXP-NBD 196, Oxford Nanopore Technologies, UK). Next, sequencing libraries were generated using the SQK-LSK109 Kit (Oxford Nanopore Technologies, Oxford, UK) and were loaded onto an R9.4.1 flow-cell (Oxford Nanopore Technologies, UK). Then, FAST5 files containing the raw signal data were base-called, demultiplexed, and trimmed using Guppy version 4.4.1 (Oxford Nanopore Technologies, UK). The reads were aligned against the CHIKV strain C302F/2016/BR (GenBank accession no. KY055011) using minimap2 version 2.17.r941 (2) and converted to a sorted BAM file using SAMtools (3). Length filtering, quality testing, and primer trimming were performed for each barcode using guppyplex. Variants were detected with medaka\_variants and the consensus sequence were built using margin\_medaka\_consensus (Oxford Nanopore Technologies, UK). Genome regions with a depth coverage below 20-fold were represented with “N” characters.

## Supplementary Figures

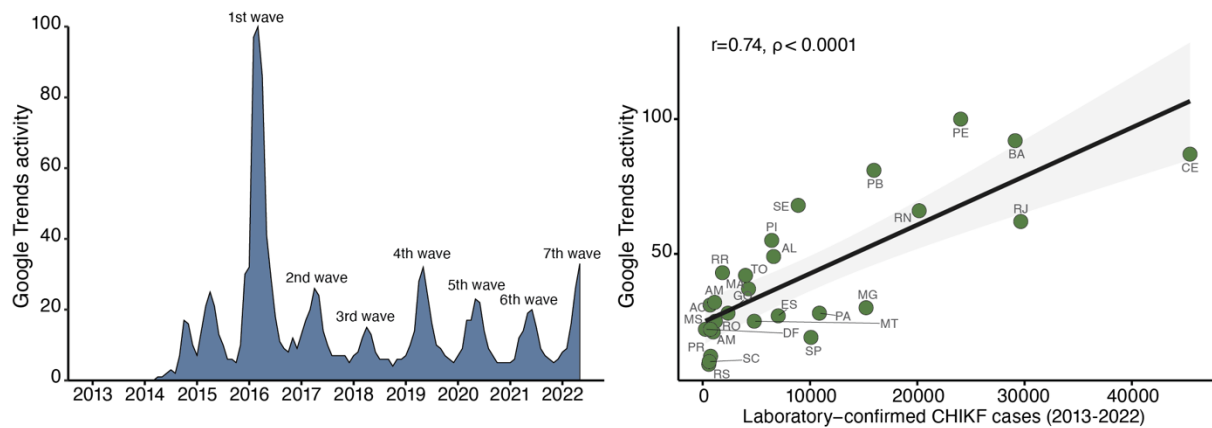

**Supplementary Figure 1. Digital surveillance of chikungunya in Brazil.** Timeline of Google Trends activity for the term “chikungunya” in Brazil from January 2013 to May 2022 (left). Correlation between Google Trends activity and laboratory confirmed chikungunya cases per state from January 2013 to May 2022 (right). The correlation was calculated using the Spearman’s rank correlation coefficient. AC, Acre; AL, Alagoas; AM, Amazonas; AP, Amapá; BA, Bahia; CE, Ceará; DF, Distrito Federal; ES, Espírito Santo; GO, Goiás; MA, Maranhão; MG, Minas Gerais; MS, Mato Grosso do Sul; MT, Mato Grosso; PA, Pará; PB, Paraíba; PE, Pernambuco; PI, Piauí; PR, Paraná; RJ, Rio de Janeiro; RN, Rio Grande do Norte; RO, Rondônia; RR, Roraima; RS, Rio Grande do Sul; SC, Santa Catarina; SE, Sergipe; SP, São Paulo; TO, Tocantins.

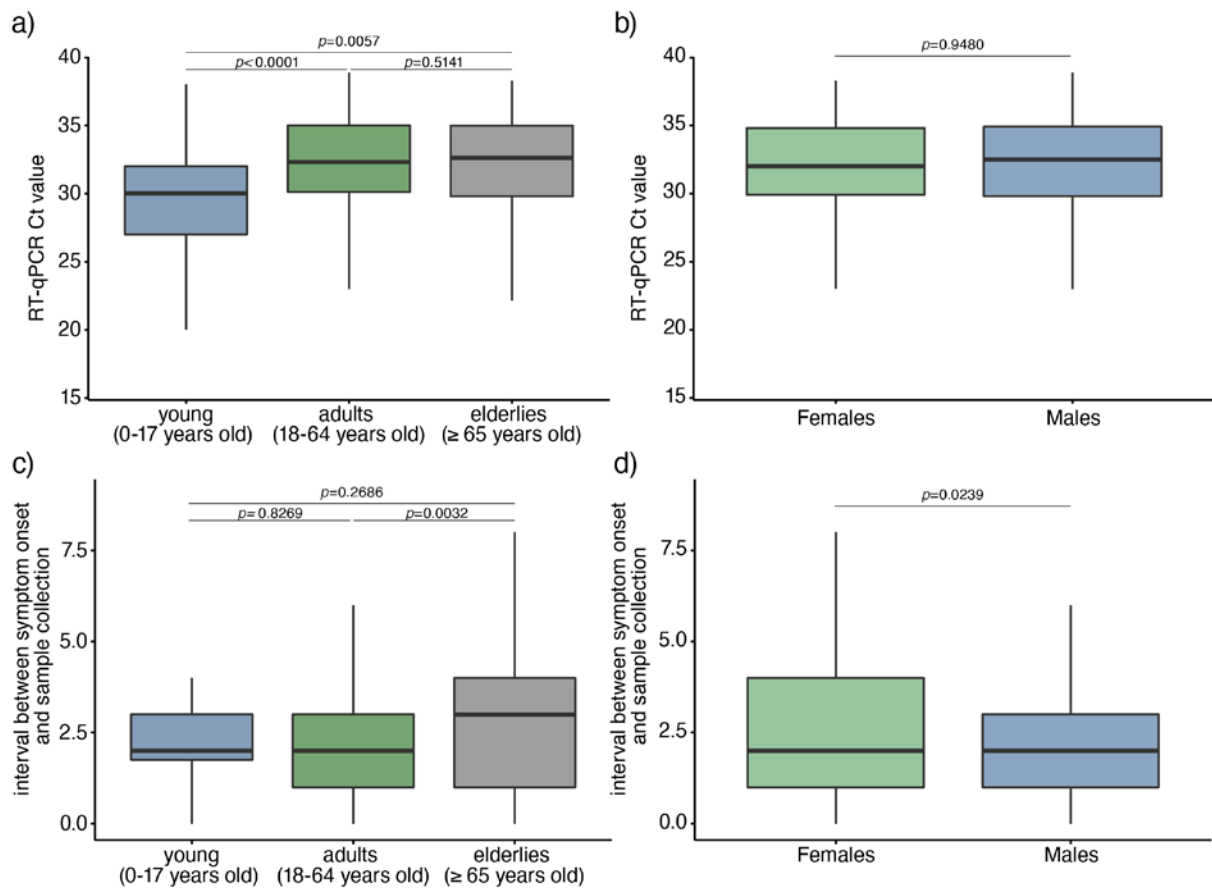

**Supplementary Figure 2. Distribution of cycle threshold values and the interval between symptom onset and sample collection at a Laboratory of Public Health of Ceará State.** Cycle threshold values for chikungunya cases were stratified according to the age group (a) or sex (b). The interval between symptom onset and sample collection per age group (c) or sex (d). The statistical difference between sexes in all age groups was calculated by One-way ANOVA with the Tukey's HSD (honestly significant difference) test. The significance level was determined as a p-value less than 0.05.

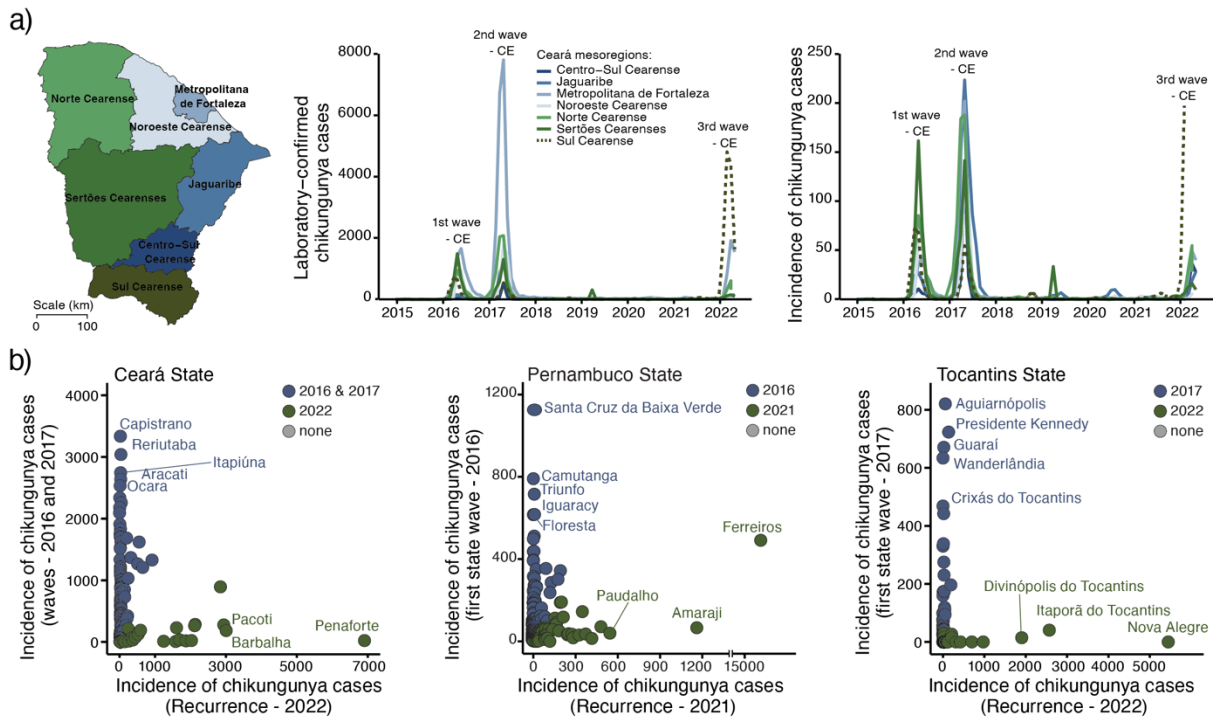

**Supplementary Figure 3. Spatiotemporal distribution of chikungunya recurrence in Brazil.** **a)** Map of mesoregions of Ceará State, Brazil (left). Number of chikungunya cases (center) and chikungunya incidence (right) per mesoregions of Ceará State from 1 January 2015 to 31 May 2022. **b)** Comparison of chikungunya incidence caused by the previous chikungunya waves and recurrence in Ceará (left), Tocantins (center), and Pernambuco States (right).

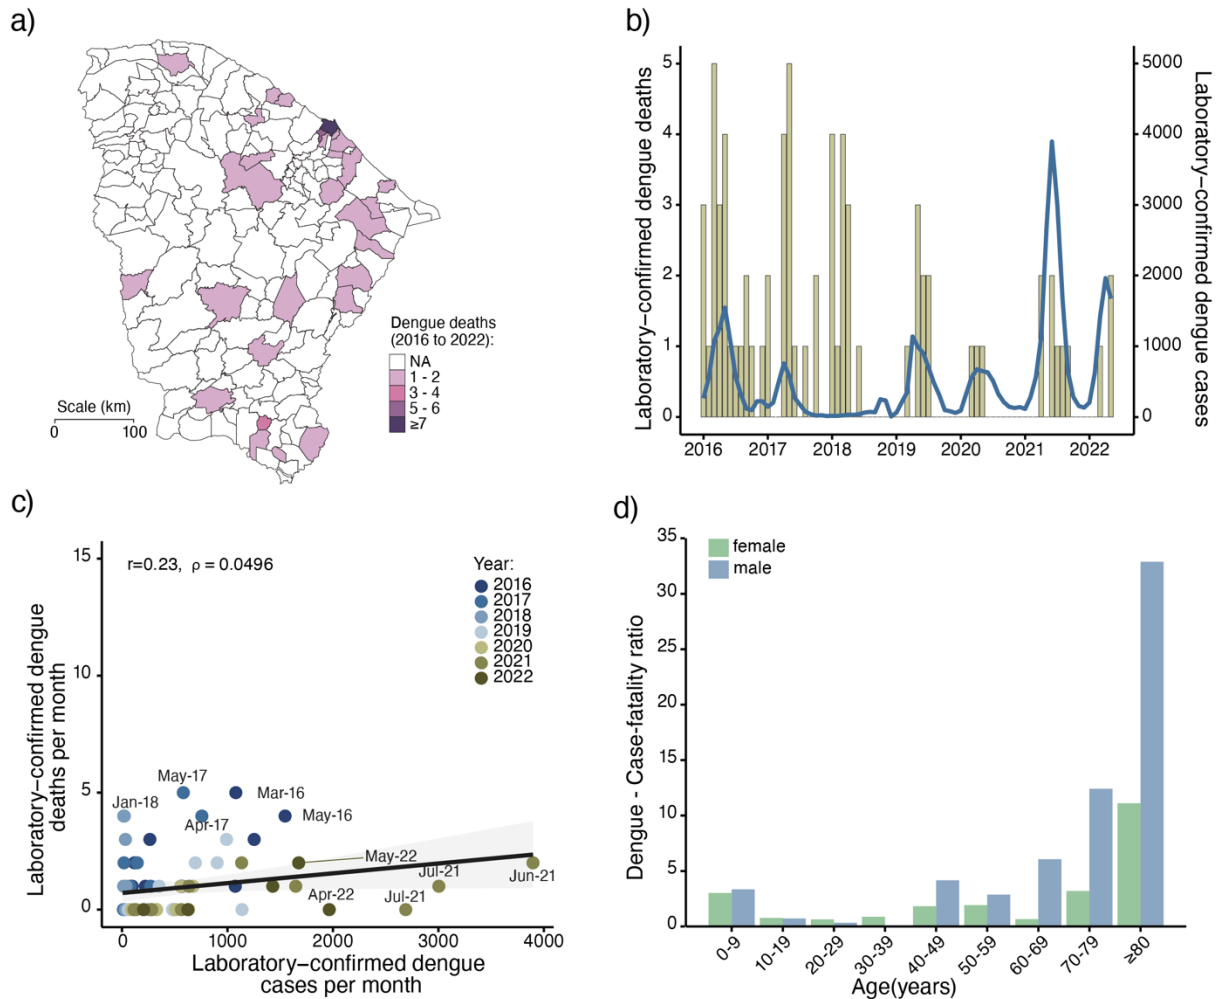

**Supplementary Figure 4. Dengue deaths in Ceará State, Brazil.** **a)** Spatial distribution of laboratory-confirmed dengue fever deaths per municipality in Ceará State from 2016 to 2022. **b)** Number of laboratory-confirmed DENV deaths (blue line) and cases (gold bars) per month from 1 January 2016 to 31 May 2022. **c)** The Pearson's correlation coefficients of laboratory-confirmed dengue deaths and laboratory-confirmed dengue cases per month from 2016 to 2022 in Ceará State. **d)** The accumulate case fatality ratio by age-sex groups from dengue from 2016 to 2022 in Ceará State.

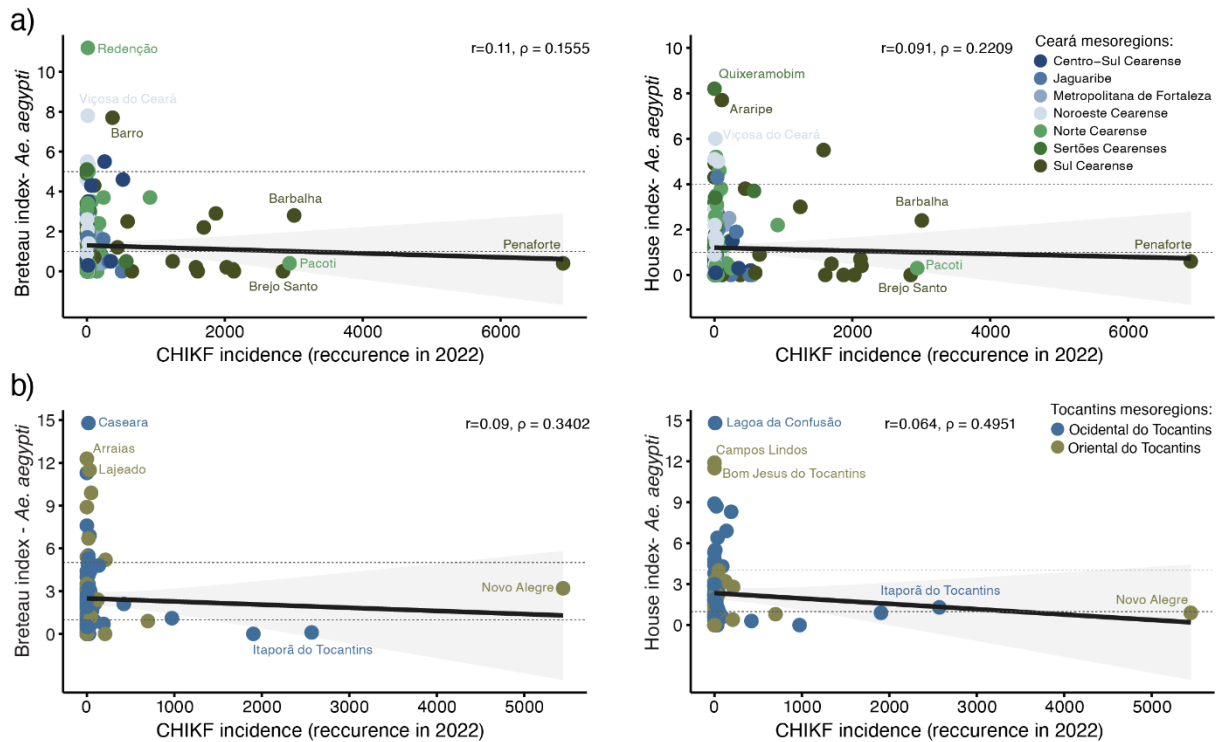

**Supplementary Figure 5. Correlation between *Ae. aegypti* population density indices and chikungunya incidence in Ceará and Tocantins States in 2022.** Correlation coefficients of Breteau index (left) and House index (right) per chikungunya incidence in 2022 in Ceará State municipalities (a) and Tocantins State municipalities (b). The correlation was calculated using Spearman's rank correlation coefficient. The circles were colored based on mesoregions. The upper dash line indicates the risk situation (Breteau index = 5 and House index = 4), and the bottom dash line denotes the alert situation (Breteau index and House index > 1) according to the National Dengue Control Programme in Brazil (4).

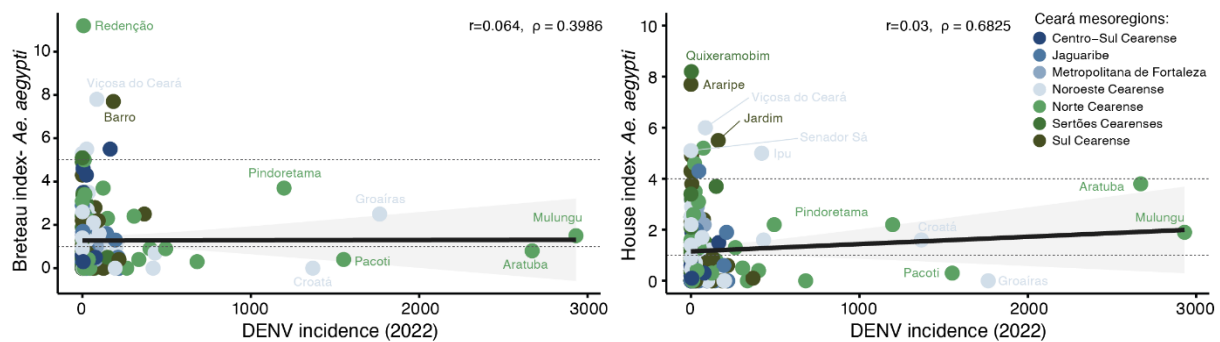

**Supplementary Figure 6. Correlation between *Ae. aegypti* population density indices and dengue incidence in Ceará in 2022.** Correlation coefficients of Breteau index (left) and House index (right) per dengue incidence in 2022. The correlation was calculated using Spearman's rank correlation coefficient. The circles were colored based on Ceará mesoregions. The upper dash line indicates the risk situation (Breteau index = 5 and House index = 4), and the bottom dash line denotes the alert situation (Breteau index and House index > 1) according to the National Dengue Control Programme in Brazil (4).

**Table Supplementary 1. Information of chikungunya cases sequenced in this study.**

| ID | Sample              | Age (years) | Sex | Municipality | Onset symptoms | Sample collection | Ct value - RT-PCR | GenBank  |
|----|---------------------|-------------|-----|--------------|----------------|-------------------|-------------------|----------|
| 1  | serum               | 45          | M   | Barbalha     | 09-Feb-22      | 10-Feb-22         | 23.3              | OP964932 |
| 3  | serum               | 11          | F   | Barbalha     | 08-Feb-22      | 10-Feb-22         | 21.94             | OP964933 |
| 4  | serum               | 29          | F   | Barbalha     | 09-Feb-22      | 10-Feb-22         | 29.55             | OP964934 |
| 5  | serum               | 27          | M   | Barbalha     | 09-Feb-22      | 10-Feb-22         | 25.14             | OP964935 |
| 6  | serum               | 59          | F   | Barbalha     | 06-Feb-22      | 10-Feb-22         | 29.03             | OP964936 |
| 7  | serum               | 59          | M   | Barbalha     | 09-Feb-22      | 10-Feb-22         | 23.14             | OP964937 |
| 8  | serum               | 24          | M   | Barbalha     | 09-Feb-22      | 10-Feb-22         | 25.36             | OP964938 |
| 9  | serum               | 57          | M   | Barbalha     | 09-Feb-22      | 10-Feb-22         | 26.15             | OP964939 |
| 10 | serum               | 20          | M   | Barbalha     | 10-Feb-22      | 10-Feb-22         | 25.49             | OP964940 |
| 11 | serum               | 55          | F   | Barbalha     | 10-Feb-22      | 10-Feb-22         | 21.63             | OP964941 |
| 12 | serum               | 56          | F   | Barbalha     | 10-Feb-22      | 10-Feb-22         | 23.33             | OP964942 |
| 13 | serum               | 27          | M   | Barbalha     | 11-Feb-22      | 15-Feb-22         | 22.9              | OP964943 |
| 14 | serum               | 31          | M   | Barbalha     | 14-Feb-22      | 15-Feb-22         | 28.96             | OP964944 |
| 15 | serum               | 46          | F   | Barbalha     | 12-Feb-22      | 15-Feb-22         | 27.69             | OP964945 |
| 16 | serum               | 74          | M   | Barbalha     | 13-Feb-22      | 15-Feb-22         | 22.13             | OP964946 |
| 17 | serum               | 46          | F   | Barbalha     | 19-Feb-22      | 21-Feb-22         | 29.35             | OP964947 |
| 18 | serum               | 12          | M   | Barbalha     | 19-Feb-22      | 21-Feb-22         | 27.17             | OP964948 |
| 20 | serum               | 27          | F   | Barbalha     | 14-Feb-22      | 17-Feb-22         | 28.49             | OP964949 |
| 21 | serum               | 64          | F   | Barbalha     | 15-Feb-22      | 18-Feb-22         | 27.73             | OP964950 |
| 22 | serum               | 43          | F   | Barbalha     | 16-Feb-22      | 18-Feb-22         | 29.68             | OP964951 |
| 23 | serum               | 68          | M   | Barbalha     | 14-Feb-22      | 18-Feb-22         | 26.49             | OP964952 |
| 24 | serum               | 11          | F   | Barbalha     | 14-Feb-22      | 18-Feb-22         | 29.27             | OP964953 |
| 25 | serum               | 46          | F   | Fortaleza    | 02-Mar-22      | 04-Mar-22         | 29.6              | OP964954 |
| 45 | serum               | 63          | M   | Fortaleza    | 06-Mar-22      | 07-Mar-22         | 28.8              | OP964955 |
| 46 | serum               | 36          | F   | Pacoti       | 28-Feb-22      | 04-Mar-22         | 30.82             | OP964956 |
| 47 | serum               | 41          | F   | Pacoti       | 07-Mar-22      | 08-Mar-22         | 30.64             | OP964957 |
| 48 | serum               | 31          | M   | Pacoti       | 07-Mar-22      | 08-Mar-22         | 30.63             | OP964958 |
| 50 | serum               | 6           | F   | Pacoti       | 06-Mar-22      | 09-Mar-22         | 29.13             | OP964959 |
| 52 | cerebrospinal fluid | 10 days     | M   | Fortaleza    | 25-Feb-22      | 03-Mar-22         | 29.6              | OP964960 |
| 53 | serum               | 1 month     | F   | Barbalha     | 17-Feb-22      | 22-Feb-22         | 24.51             | OP964961 |
| 54 | serum               | 77          | F   | Pacoti       | 25-Feb-22      | 28-Feb-22         | 28.68             | OP964962 |
| 55 | serum               | 49          | M   | Barbalha     | 22-Feb-22      | 23-Feb-22         | 29.94             | OP964963 |
| 56 | serum               | 68          | F   | Barbalha     | 21-Feb-22      | 22-Feb-22         | 29.93             | OP964964 |
| 57 | serum               | 37          | F   | Pacoti       | 06-Feb-22      | 07-Feb-22         | 29.59             | OP964964 |
| 58 | serum               | 62          | M   | Barbalha     | 11-Feb-22      | 15-Feb-22         | 18                | OP964966 |
| 59 | serum               | 10          | F   | Barbalha     | 14-Feb-22      | 16-Feb-22         | 23                | OP964967 |
| 60 | serum               | 53          | F   | Barbalha     | 14-Feb-22      | 15-Feb-22         | 20                | OP964968 |
| 61 | serum               | 83          | M   | Barbalha     | 13-Feb-22      | 15-Feb-22         | 21                | OP964969 |
| 62 | serum               | 43          | M   | Barbalha     | 14-Feb-22      | 15-Feb-22         | 24                | OP964970 |



|    |       |    |   |                   |  |           |           |    |          |
|----|-------|----|---|-------------------|--|-----------|-----------|----|----------|
| 63 | serum | 46 | F | Barbalha          |  | 13-Feb-22 | 14-Feb-22 | 27 | OP964971 |
| 64 | serum | 5  | M | Barbalha          |  | 14-Feb-22 | 16-Feb-22 | 20 | OP964972 |
| 65 | serum | 33 | F | Barbalha          |  | 13-Feb-22 | 16-Feb-22 | 20 | OP964973 |
| 66 | serum | 76 | M | Barbalha          |  | 12-Feb-22 | 16-Feb-22 | 17 | OP964974 |
| 67 | serum | 46 | F | Barbalha          |  | 14-Feb-22 | 17-Feb-22 | 21 | OP964975 |
| 68 | serum | 37 | F | Penaforte         |  | 22-Feb-22 | 24-Feb-22 | 20 | OP964976 |
| 70 | serum | 66 | F | Juazeiro do Norte |  | 03-Mar-22 | 07-Mar-22 | 28 | OP964977 |
| 72 | serum | 72 | F | Juazeiro do Norte |  | 03-Mar-22 | 07-Mar-22 | 18 | OP964978 |
| 73 | serum | 39 | F | Farias Brito      |  | 03-Mar-22 | 07-Mar-22 | 25 | OP964979 |
| 74 | serum | 8  | F | Juazeiro do Norte |  | 03-Mar-22 | 08-Mar-22 | 23 | OP964980 |
| 75 | serum | 73 | F | Juazeiro do Norte |  | 03-Mar-22 | 08-Mar-22 | 19 | OP964981 |
| 76 | serum | 22 | F | Juazeiro do Norte |  | 03-Mar-22 | 08-Mar-22 | 27 | OP964982 |
| 77 | serum | 40 | F | Juazeiro do Norte |  | 03-Mar-22 | 08-Mar-22 | 21 | OP964983 |
| 78 | serum | 36 | F | Juazeiro do Norte |  | 03-Mar-22 | 08-Mar-22 | 23 | OP964984 |
| 79 | serum | 74 | F | Juazeiro do Norte |  | 03-Mar-22 | 08-Mar-22 | 21 | OP964985 |
| 80 | serum | 3  | M | Juazeiro do Norte |  | 07-Mar-22 | 09-Mar-22 | 20 | OP964986 |
| 81 | serum | 65 | M | Juazeiro do Norte |  | 03-Mar-22 | 09-Mar-22 | 30 | OP964987 |
| 82 | serum | 60 | M | Juazeiro do Norte |  | 03-Mar-22 | 09-Mar-22 | 25 | OP964988 |
| 83 | serum | 77 | M | Juazeiro do Norte |  | 03-Mar-22 | 09-Mar-22 | 20 | OP964989 |
| 84 | serum | 57 | F | Juazeiro do Norte |  | 03-Mar-22 | 09-Mar-22 | 22 | OP964990 |
| 85 | serum | 37 | F | Juazeiro do Norte |  | 03-Mar-22 | 09-Mar-22 | 21 | OP964991 |
| 86 | serum | 23 | M | Juazeiro do Norte |  | 03-Mar-22 | 09-Mar-22 | 24 | OP964992 |

Legend: F, female. M, male.

**Table Supplementary 2. Chikungunya epidemic waves in Brazil.**

| Wave | Year | Total cases <sup>1</sup> | States most affected | Number case in wave         | Period of CHIFV epidemic peak | Peak of CHIFV cases <sup>3</sup> |
|------|------|--------------------------|----------------------|-----------------------------|-------------------------------|----------------------------------|
| 1    | 2016 | 44,604                   | Pernambuco           | 8,794 (19.7%) <sup>2</sup>  | February to March             | 539 to 758                       |
|      |      |                          | Ceará                | 11,474 (27.7%) <sup>2</sup> | April to June                 | 575 to 835                       |
| 2    | 2017 | 41,974                   | Ceará                | 21,486 (51.2%) <sup>2</sup> | March to July                 | 535 to 1,692                     |
| 3    | 2018 | 24,097                   | Rio de Janeiro       | 6,316 (26.2%) <sup>2</sup>  | April                         | 329 to 392                       |
| 4    | 2019 | 33,740                   | Rio de Janeiro       | 15,984 (47.4%) <sup>2</sup> | April to June                 | 581 to 1,087                     |
| 5    | 2020 | 31,233                   | Bahia                | 12,390 (39.7%) <sup>2</sup> | May to June                   | 562 to 620                       |
| 6    | 2021 | 39,224                   | Pernambuco           | 6,628 (16.9%) <sup>2</sup>  | June to July                  | 311 to 407                       |
|      |      |                          | São Paulo            | 6,539 (16.7%) <sup>2</sup>  | March to April                | 304 to 390                       |
| 7    | 2022 | 35,183                   | Ceará                | 8,413 (23.9%) <sup>2</sup>  | March to May                  | ≥ 500*                           |

Legend: <sup>1</sup>Total of chikungunya cases reported in Brazil to the Ministry of Health. <sup>2</sup>Percentage of chikungunya cases in the state related to the total cases in the wave. <sup>3</sup> Number of chikungunya cases per epidemiological week in the peak of epidemic in the state. \*Data available up to May 2022.

**Table Supplementary 3. Probability of chikungunya across sexes and age-groups in Ceará State from 2016 to 2022.**

| Groups          | Odds ratio (95% CI) | p-value |
|-----------------|---------------------|---------|
| Male            | 0.87 (0.85 - 0.89)  | <0.0001 |
| 18-39 years old | 1.32 (1.27 - 1.36)  | <0.0001 |
| 40-54 years old | 1.71 (1.65 - 1.77)  | <0.0001 |
| 55-74 years old | 2.05 (1.98 - 2.13)  | <0.0001 |
| ≥75 years old   | 2.33 (2.18 - 2.49)  | <0.0001 |

Logistic regression using the dataset of all individuals tested for chikungunya in Ceará State from 2016 to 2022. Reference group for sex is female, and the age-group <18 years old was used as reference age-group. The significance level was determined as a p-value less than 0.05. 95% CI, 95% confidence interval (lower and upper).

**Table Supplementary 4. Probability of chikungunya-related death across sexes and age-groups in Ceará State from 2016 to 2022.**

| Groups          | Odds ratio (95% CI) | p-value |
|-----------------|---------------------|---------|
| Male            | 0.73 (0.46 - 1.15)  | 0.1776  |
| 18-39 years old | 1.71 (0.81 - 3.6)   | 0.1571  |
| 40-54 years old | 1.71 (0.82 - 3.53)  | 0.1503  |
| 55-74 years old | 2.28 (1.11 - 4.68)  | 0.0249  |
| ≥75 years old   | 4.01 (1.83 - 8.78)  | 0.0005  |

Logistic regression using the dataset of all deaths tested for chikungunya in Ceará State from 2016 to 2022. Reference group for sex is female and the age-group <18 years old was used as reference age-group. The significance level was determined as a p-value less than 0.05. 95% CI, 95% confidence interval (lower and upper).

**Table 5. Dataset of Brazilian chikungunya virus complete coding sequences classified into East-Central-South-African genotype and available in GenBank.**

| GenBank  | Country | State               | Date      |
|----------|---------|---------------------|-----------|
| MG649984 | Brazil  | Rio de Janeiro      | 2015      |
| MG649985 | Brazil  | Rio de Janeiro      | 2015      |
| KP164568 | Brazil  | Bahia               | 26-Aug-14 |
| KP164569 | Brazil  | Bahia               | 28-Aug-14 |
| KP164570 | Brazil  | Bahia               | 3-Sep-14  |
| MK121891 | Brazil  | Amazonas            | 15-Jul-15 |
| MK121892 | Brazil  | Amazonas            | 15-Jul-15 |
| MK121893 | Brazil  | Amazonas            | 15-Jul-15 |
| KU940226 | Brazil  | Bahia               | 1-Aug-15  |
| MK993756 | Brazil  | Rio Grande do Norte | 14-Jan-16 |
| MK121894 | Brazil  | Amazonas            | 30-Jan-16 |
| MH000700 | Brazil  | Pernambuco          | 5-Feb-16  |
| MH000702 | Brazil  | Pernambuco          | 15-Feb-16 |

|          |        |                |           |
|----------|--------|----------------|-----------|
| MH000703 | Brazil | Pernambuco     | 15-Feb-16 |
| MH000706 | Brazil | Pernambuco     | 18-Feb-16 |
| MH000704 | Brazil | Pernambuco     | 19-Feb-16 |
| MK244635 | Brazil | Rio de Janeiro | 19-Feb-16 |
| KY055011 | Brazil | Sergipe        | 20-Feb-16 |
| MH000705 | Brazil | Pernambuco     | 25-Feb-16 |
| KY124328 | Brazil | Rio de Janeiro | 16-Mar-16 |
| KY124329 | Brazil | Rio de Janeiro | 16-Mar-16 |
| MG649983 | Brazil | Rio de Janeiro | 28-Mar-16 |
| MG649970 | Brazil | Rio de Janeiro | 29-Mar-16 |
| MG649976 | Brazil | Rio de Janeiro | 29-Mar-16 |
| KY704933 | Brazil | Alagoas        | 30-Mar-16 |
| KY704935 | Brazil | Alagoas        | 1-Apr-16  |
| KY704936 | Brazil | Alagoas        | 1-Apr-16  |
| MN783352 | Brazil | Bahia          | 1-Apr-16  |
| MK244632 | Brazil | Rio de Janeiro | 5-Apr-16  |
| MK244638 | Brazil | Rio de Janeiro | 5-Apr-16  |
| OM128439 | Brazil | Rio de Janeiro | 6-Apr-16  |
| KY704949 | Brazil | Alagoas        | 7-Apr-16  |
| KY704950 | Brazil | Alagoas        | 7-Apr-16  |
| KY704952 | Brazil | Alagoas        | 7-Apr-16  |
| MG649974 | Brazil | Rio de Janeiro | 8-Apr-16  |
| KY704953 | Brazil | Alagoas        | 9-Apr-16  |
| KY704940 | Brazil | Alagoas        | 14-Apr-16 |
| KY704941 | Brazil | Alagoas        | 14-Apr-16 |
| KY704945 | Brazil | Alagoas        | 14-Apr-16 |
| KY704947 | Brazil | Alagoas        | 15-Apr-16 |
| KY704942 | Brazil | Alagoas        | 16-Apr-16 |
| KY704939 | Brazil | Alagoas        | 17-Apr-16 |
| KY704938 | Brazil | Alagoas        | 19-Apr-16 |
| KY704948 | Brazil | Alagoas        | 19-Apr-16 |
| MK244639 | Brazil | Rio de Janeiro | 19-Apr-16 |
| MG649980 | Brazil | Rio de Janeiro | 27-Apr-16 |
| MK244634 | Brazil | Rio de Janeiro | 27-Apr-16 |
| OM128438 | Brazil | Rio de Janeiro | 29-Apr-16 |
| MK244636 | Brazil | Rio de Janeiro | 2-May-16  |
| MG649972 | Brazil | Rio de Janeiro | 5-May-16  |
| MK244633 | Brazil | Rio de Janeiro | 6-May-16  |
| MK244637 | Brazil | Rio de Janeiro | 10-May-16 |
| KY704955 | Brazil | Paraíba        | 17-Jun-16 |
| KY704954 | Brazil | Paraíba        | 20-Jun-16 |
| KU940225 | Brazil | Bahia          | 15-Jul-16 |

|          |        |                |           |
|----------|--------|----------------|-----------|
| MG649975 | Brazil | Rio de Janeiro | 27-Jul-16 |
| MG649977 | Brazil | Rio de Janeiro | 28-Jul-16 |
| MG649981 | Brazil | Rio de Janeiro | 28-Jul-16 |
| MG649971 | Brazil | Rio de Janeiro | 22-Aug-16 |
| MN783353 | Brazil | Bahia          | 13-Oct-16 |
| MG649973 | Brazil | Rio de Janeiro | 12-Dec-16 |
| MT526900 | Brazil | Pará           | 24-Jan-17 |
| MT526900 | Brazil | Pará           | 25-Jan-17 |
| MT526901 | Brazil | Pará           | 25-Jan-17 |
| MT526902 | Brazil | Pará           | 25-Jan-17 |
| MT526903 | Brazil | Pará           | 26-Jan-17 |
| MT526904 | Brazil | Pará           | 26-Jan-17 |
| MK121897 | Brazil | Roraima        | 20-Feb-17 |
| MK121898 | Brazil | Roraima        | 22-Feb-17 |
| MK121904 | Brazil | Roraima        | 2-Mar-17  |
| MK121905 | Brazil | Roraima        | 2-Mar-17  |
| MK121896 | Brazil | Roraima        | 3-Mar-17  |
| MK121908 | Brazil | Roraima        | 5-Mar-17  |
| MK244640 | Brazil | Rio de Janeiro | 7-Mar-17  |
| MK244641 | Brazil | Rio de Janeiro | 9-Mar-17  |
| MK121903 | Brazil | Roraima        | 15-Mar-17 |
| MG649978 | Brazil | Rio de Janeiro | 16-Mar-17 |
| MK121899 | Brazil | Roraima        | 17-Mar-17 |
| MK121900 | Brazil | Roraima        | 17-Mar-17 |
| MK121901 | Brazil | Roraima        | 17-Mar-17 |
| MK121902 | Brazil | Roraima        | 17-Mar-17 |
| MT877207 | Brazil | Ceará          | 19-Mar-17 |
| MK121895 | Brazil | Amazonas       | 20-Mar-17 |
| MT877208 | Brazil | Ceará          | 22-Mar-17 |
| MG649982 | Brazil | Rio de Janeiro | 24-Mar-17 |
| MK121906 | Brazil | Roraima        | 27-Mar-17 |
| MK121907 | Brazil | Roraima        | 27-Mar-17 |
| MT877210 | Brazil | Ceará          | 14-Apr-17 |
| MK518395 | Brazil | Maranhão       | 16-May-17 |
| MT877211 | Brazil | Ceará          | 3-Jun-17  |
| MK244642 | Brazil | Rio de Janeiro | 18-Feb-18 |
| OM128440 | Brazil | Rio de Janeiro | 20-Mar-18 |
| MK244644 | Brazil | Rio de Janeiro | 26-Mar-18 |
| OM128432 | Brazil | Rio de Janeiro | 26-Mar-18 |
| MK244647 | Brazil | Rio de Janeiro | 27-Mar-18 |
| MK244643 | Brazil | Rio de Janeiro | 28-Mar-18 |
| MK244645 | Brazil | Rio de Janeiro | 28-Mar-18 |

|          |        |                     |           |
|----------|--------|---------------------|-----------|
| MK244646 | Brazil | Rio de Janeiro      | 28-Mar-18 |
| MK244649 | Brazil | Rio de Janeiro      | 3-Apr-18  |
| MK244650 | Brazil | Rio de Janeiro      | 3-Apr-18  |
| MK244648 | Brazil | Rio de Janeiro      | 4-Apr-18  |
| MK244651 | Brazil | Rio de Janeiro      | 5-Apr-18  |
| MK244652 | Brazil | Rio de Janeiro      | 5-Apr-18  |
| MK244653 | Brazil | Rio de Janeiro      | 6-Apr-18  |
| MK244655 | Brazil | Rio de Janeiro      | 6-Apr-18  |
| MK244656 | Brazil | Rio de Janeiro      | 6-Apr-18  |
| OM128436 | Brazil | Rio de Janeiro      | 5-Jun-18  |
| OM128431 | Brazil | Rio de Janeiro      | 6-Jun-18  |
| OM128433 | Brazil | Rio de Janeiro      | 6-Jun-18  |
| OM128434 | Brazil | Rio de Janeiro      | 7-Jun-18  |
| OM128437 | Brazil | Rio de Janeiro      | 7-Jun-18  |
| MK156054 | Brazil | Bahia               | 21-Sep-18 |
| MK156055 | Brazil | Bahia               | 21-Sep-18 |
| MK156056 | Brazil | Bahia               | 21-Sep-18 |
| MK156058 | Brazil | Bahia               | 21-Sep-18 |
| MK156059 | Brazil | Bahia               | 21-Sep-18 |
| MK156060 | Brazil | Bahia               | 26-Sep-18 |
| MK156061 | Brazil | Bahia               | 26-Sep-18 |
| MK156062 | Brazil | Bahia               | 26-Sep-18 |
| MK156063 | Brazil | Bahia               | 26-Sep-18 |
| MK156064 | Brazil | Bahia               | 26-Sep-18 |
| MW260512 | Brazil | Rio Grande do Norte | 23-Mar-19 |
| MW260513 | Brazil | Rio Grande do Norte | 23-Mar-19 |
| MW260515 | Brazil | Rio Grande do Norte | 28-Mar-19 |
| MW260516 | Brazil | Rio Grande do Norte | 28-Mar-19 |
| MW260518 | Brazil | Rio Grande do Norte | 30-Mar-19 |
| OL898663 | Brazil | São Paulo           | 5-Sep-20  |
| OL898714 | Brazil | São Paulo           | 20-Nov-20 |
| OL898669 | Brazil | São Paulo           | 17-Dec-20 |
| OL898675 | Brazil | São Paulo           | 26-Dec-20 |
| OL898668 | Brazil | São Paulo           | 6-Jan-21  |
| OL898682 | Brazil | São Paulo           | 7-Jan-21  |
| OL898707 | Brazil | São Paulo           | 7-Jan-21  |
| OL898689 | Brazil | São Paulo           | 15-Jan-21 |
| OL898690 | Brazil | São Paulo           | 16-Jan-21 |
| OL898674 | Brazil | São Paulo           | 23-Jan-21 |
| OL898696 | Brazil | São Paulo           | 28-Jan-21 |
| OL898700 | Brazil | São Paulo           | 28-Jan-21 |
| OL898704 | Brazil | São Paulo           | 28-Jan-21 |

|          |        |                |           |
|----------|--------|----------------|-----------|
| OL898664 | Brazil | São Paulo      | 31-Jan-21 |
| OL898683 | Brazil | São Paulo      | 31-Jan-21 |
| OL898667 | Brazil | São Paulo      | 1-Feb-21  |
| OL898670 | Brazil | São Paulo      | 2-Feb-21  |
| OL898676 | Brazil | São Paulo      | 2-Feb-21  |
| OL898710 | Brazil | São Paulo      | 2-Feb-21  |
| OL898711 | Brazil | São Paulo      | 8-Feb-21  |
| OL898697 | Brazil | São Paulo      | 9-Feb-21  |
| OL898699 | Brazil | São Paulo      | 9-Feb-21  |
| OL898706 | Brazil | São Paulo      | 9-Feb-21  |
| OL898677 | Brazil | São Paulo      | 13-Feb-21 |
| OL898693 | Brazil | São Paulo      | 13-Feb-21 |
| OL898705 | Brazil | São Paulo      | 13-Feb-21 |
| OL898684 | Brazil | São Paulo      | 14-Feb-21 |
| OL898671 | Brazil | São Paulo      | 16-Feb-21 |
| OL898712 | Brazil | São Paulo      | 18-Feb-21 |
| OL898681 | Brazil | São Paulo      | 20-Feb-21 |
| OL898691 | Brazil | São Paulo      | 21-Feb-21 |
| OL898665 | Brazil | São Paulo      | 22-Feb-21 |
| OL898685 | Brazil | São Paulo      | 22-Feb-21 |
| OL898666 | Brazil | São Paulo      | 25-Feb-21 |
| OL898672 | Brazil | São Paulo      | 25-Feb-21 |
| OL898698 | Brazil | São Paulo      | 25-Feb-21 |
| OL898678 | Brazil | São Paulo      | 5-Mar-21  |
| OL898692 | Brazil | São Paulo      | 9-Mar-21  |
| OL898673 | Brazil | São Paulo      | 15-Mar-21 |
| OL898680 | Brazil | São Paulo      | 22-Mar-21 |
| OL898688 | Brazil | São Paulo      | 23-Mar-21 |
| OL898686 | Brazil | São Paulo      | 25-Mar-21 |
| OL898703 | Brazil | São Paulo      | 6-Apr-21  |
| OL898695 | Brazil | São Paulo      | 11-Apr-21 |
| OL898679 | Brazil | São Paulo      | 13-Apr-21 |
| OL898687 | Brazil | São Paulo      | 16-Apr-21 |
| OL898702 | Brazil | São Paulo      | 27-Apr-21 |
| OL898713 | Brazil | São Paulo      | 29-Apr-21 |
| OL898701 | Brazil | São Paulo      | 5-May-21  |
| OL898708 | Brazil | São Paulo      | 5-May-21  |
| OL898715 | Brazil | São Paulo      | 6-May-21  |
| OL898694 | Brazil | São Paulo      | 11-May-21 |
| OL898709 | Brazil | São Paulo      | 12-May-21 |
| MG649979 | Brazil | Rio de Janeiro | Mar-17    |

## References

1. Quick J, Grubaugh ND, Pullan ST, Claro IM, Smith AD, Gangavarapu K, et al. Multiplex PCR method for MinION and Illumina sequencing of Zika and other virus genomes directly from clinical samples. *Nat Protoc.* 2017;12(6):1261-76.
2. Li H. Minimap2: pairwise alignment for nucleotide sequences. *Bioinformatics.* 2018;34(18):3094-100.
3. Li H, Handsaker B, Wysoker A, Fennell T, Ruan J, Homer N, et al. The Sequence Alignment/Map format and SAMtools. *Bioinformatics.* 2009;25(16):2078-9.
4. Ministério da Saúde do Brasil. Programa Nacional de Controle da Dengue. Brasília, 2002.
